# Supplementary material
Source: PubMed Central journal article supplement (PMC8242895)
Supplement: TJP-599-3627-s001.pdf [file TJP-599-3627-s001.pdf]

□

# Silent hypoxia; A more holistic view could contribute to our understanding of "silent hypoxaemia" in Covid -19 patients (JP-TR-2020-280769XR1)

Eric Mulder, Frank Pernet, and Erika K A Schagatay  
DOI: 10.1113/JP281882

*Corresponding author(s): Eric Mulder (eric.mulder@miun.se)*

*The referees have opted to remain anonymous.*

---

## Review Timeline:

Submission Date:

21-May-2021

Accepted:

24-May-2021

---

*Senior Editor: Ian Forsythe*

*Reviewing Editor: Scott Powers*

## Transaction Report:

(Note: With the exception of the correction of typographical or spelling errors that could be a source of ambiguity, letters and reports are not edited. Depending on transfer agreements, referee reports obtained elsewhere may or may not be included in this compilation. Referee reports are anonymous unless the Referee chooses to sign their reports.)

Dear Mr Mulder,

Re: JP-LE-2021-281882 "Silent hypoxia; A more holistic view could contribute to our understanding of "silent hypoxaemia" in Covid -19 patients (JP-TR-2020-280769XR1)" by Eric Mulder  
Frank Pernet  
Erika K A Schagatay

I am pleased to inform you that your submitted Letter to the Editor has been accepted for publication in The Journal of Physiology.

The last Word version of the paper submitted will be used by the Production Editors to prepare your proof. When this is ready you will receive an email containing a link to Wiley's Online Proofing System. The proof should be checked and corrected as quickly as possible.

**NEW POLICY:** In order to improve the transparency of its peer review process The Journal of Physiology publishes online as supporting information the peer review history of all articles accepted for publication. Readers will have access to decision letters, including all Editors' comments and referee reports, for each version of the manuscript and any author responses to peer review comments. Referees can decide whether or not they wish to be named on the peer review history document.

All queries at proof stage should be sent to [tjp@wiley.com](mailto:tjp@wiley.com)

Yours sincerely,

Ian D. Forsythe  
Deputy Editor-in-Chief  
The Journal of Physiology  
<https://jpp.msubmit.net>  
<http://jpp.physoc.org>  
The Physiological Society  
Hodgkin Huxley House  
30 Farringdon Lane  
London, EC1R 3AW  
UK  
<http://www.physoc.org>  
<http://journals.physoc.org>

#### REVIEWING EDITOR COMMENTS:

Thank you for submitting your letter to the editor commenting on the published review "Silent hypoxia; A more holistic view could contribute to our understanding of "silent hypoxaemia" in Covid -19 patients". Your remarks are valuable and provide additional insight into the topics addressed in this review.

SENIOR EDITOR COMMENTS:

Thank you for this letter. It is an interesting addition to the discussion on the topic.
